# Supplementary material
Source: PubMed Central journal article supplement (PMC4447559)

**A**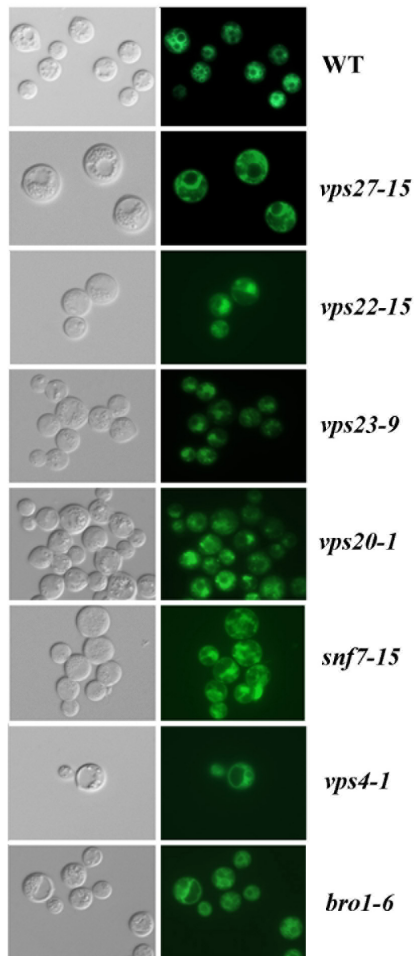**B**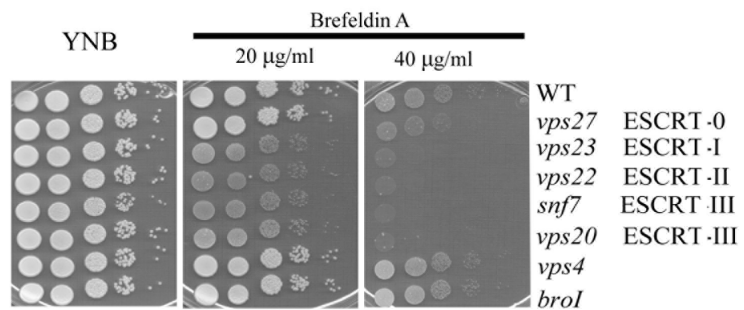

**A**YNB + 150 $\mu$ M BPS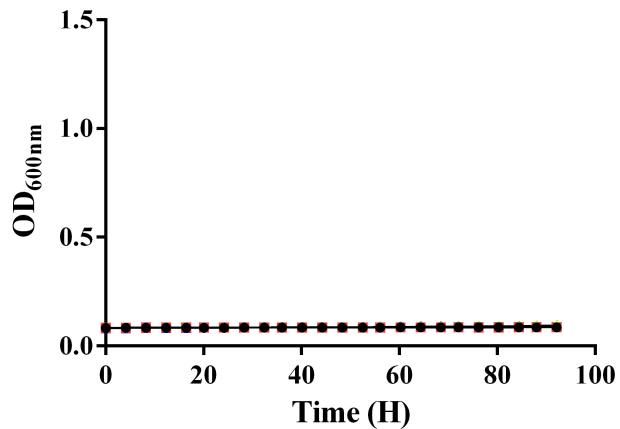**B**YNB + 150 $\mu$ M BPS + 10 $\mu$ M FeCl<sub>3</sub>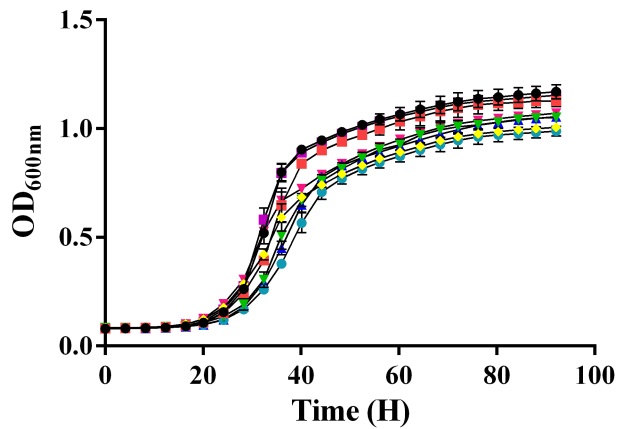**C**YNB + 150  $\mu$ M BPS +100 $\mu$ M FeCl<sub>3</sub>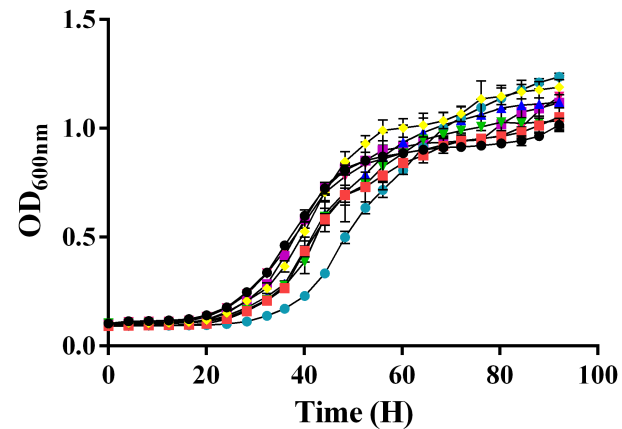**D**YNB + 150 $\mu$ M BPS +10 $\mu$ M Hemin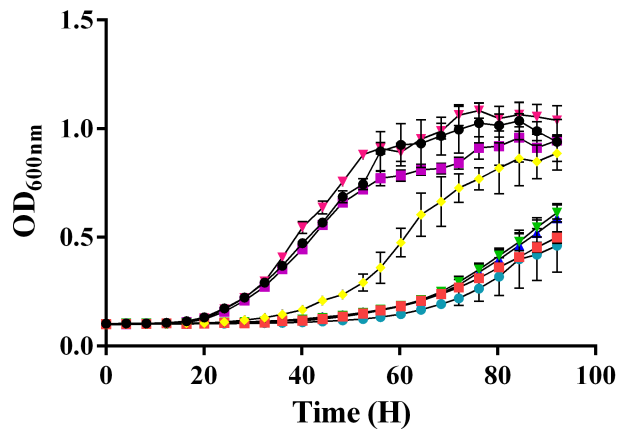**E**YNB + 150 $\mu$ M BPS + 100 $\mu$ M Hemin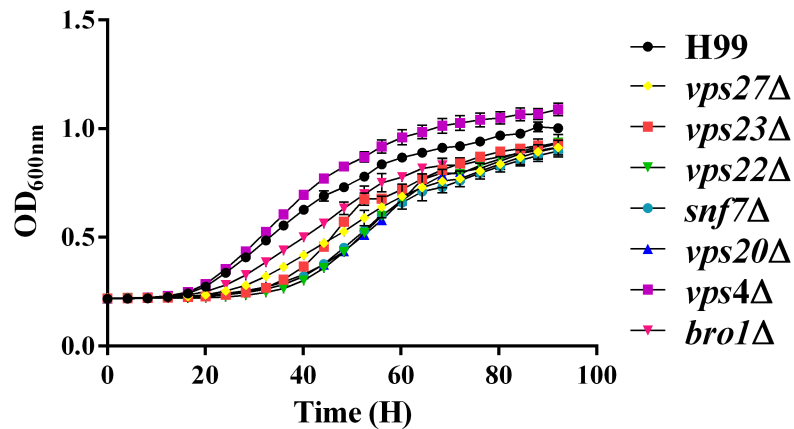

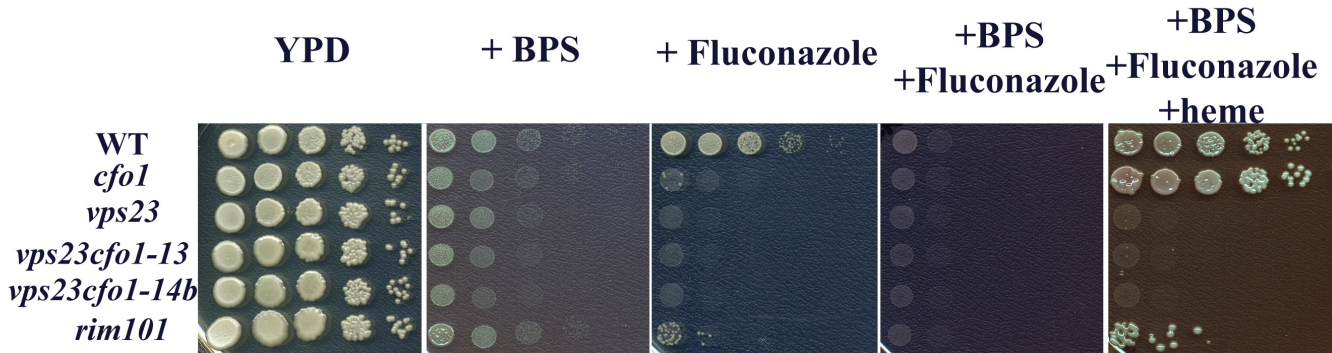

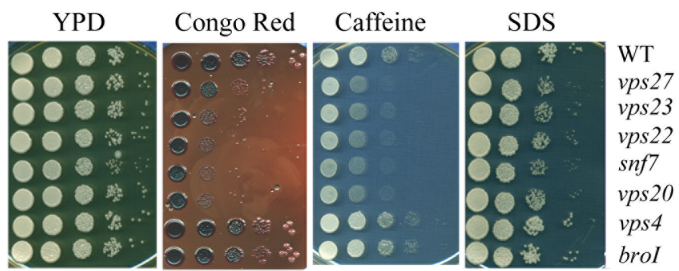

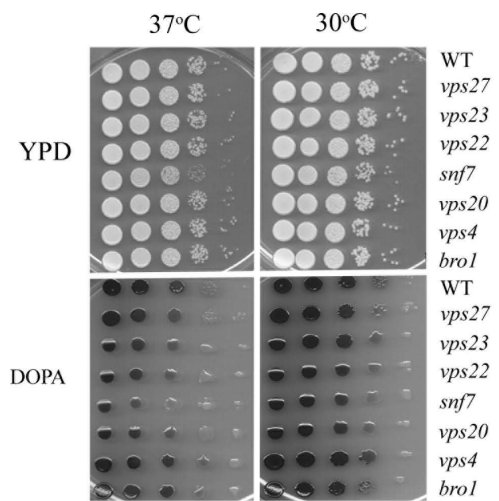

# *CIG1*

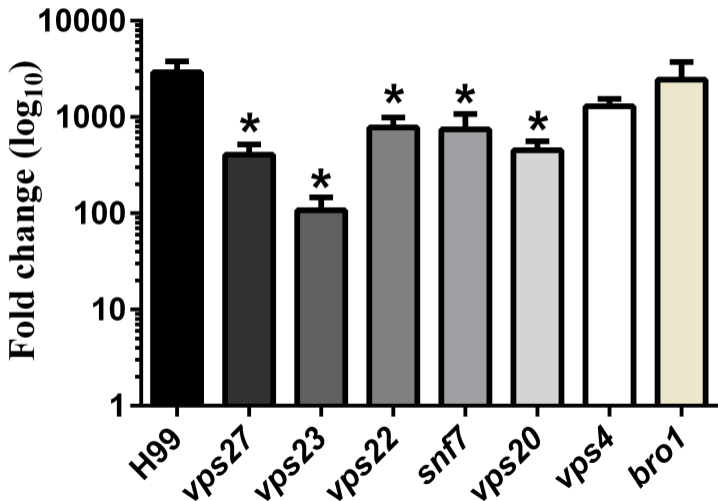

Supplement: NIHMS682283-supplement-Supp_FigureS1-S6.pdf [file NIHMS682283-supplement-Supp_FigureS1-S6.pdf]
